# Supplementary material
Source: PubMed Central journal article supplement (PMC2639665)
Supplement: 97320630003173S1.pdf [file 97320630003173S1.pdf]

### Supplementary material

```
>extracted region of Acinetobacter sp. ADP1 genome from 17883 to 18443
Length of sequence-          561
Threshold for promoters -    0.20
Number of predicted promoters -      1
Promoter Pos:      321 LDF-    5.48
-10 box at pos.    306 GAGTAACAT Score    52
-35 box at pos.    287 TTGACT   Score    61

Oligonucleotides from known TF binding sites:

For promoter at      321:
  narP:  TTTAGAGT at position    302 Score -   8
  ompR:  GTAACATA at position    308 Score -  11
  fadR:  CCGACCTA at position    317 Score -  16
```

Figure 2: Output of BPROM tool sited at SoftBerry.

| TF   | TF binding site | Position of TF binding site | Score | Reference               | Function                                                                                                                                                                                                                                                                                                                               |
|------|-----------------|-----------------------------|-------|-------------------------|----------------------------------------------------------------------------------------------------------------------------------------------------------------------------------------------------------------------------------------------------------------------------------------------------------------------------------------|
| narP | TTTAGAGT        | 302                         | 8     | Swiss-Prot entry P31802 | This protein activates the expression of the nitrate reductase (narGHJI) and formate dehydrogenase-N (fdnGHI) operons and represses the transcription of the fumarate reductase (frdABCD) operon in response to a nitrate/nitrite induction signal transmitted by either the narX or narQ proteins.                                    |
| ompR | GTAACATA        | 308                         | 11    | Swiss-Prot entry P0AA16 | The N-terminus of this protein is required for the transcriptional expression of both major outer membrane protein genes ompF and ompC; its C-terminal moiety mediates the multimerization of the ompR protein. As a multimer, it turns on the expression of the ompC gene; as a monomer, it turns on the expression of the ompF gene. |
| fadR | CCGACCTA        | 317                         | 16    | Swiss-Prot entry A7ZKV8 | Multifunctional regulator of fatty acid metabolism                                                                                                                                                                                                                                                                                     |

Table 1: Details of Putative TF binding sites with sequence and function found in upstream region of *Acinetobacter* species 16S rRNA gene.
